# Supplementary material for: Inversion, Assessment of Stability and Uncertainty of Geoelectric Sounding data using a New Hybrid Meta-heuristic algorithm and Posterior Probability Density Function Approach
Source: Copernicus journal article supplement (doi:10.5194/npg-2022-13), 2022-11-23
Supplement: Supplementary file [file npg-2022-13-RC1-supplement.pdf]

## **Comments to Author**

I appreciate the authors effort to attempt a new hybrid metaheuristic algorithm for inverting geoelectrical data

Few things need to be addressed before going for publication

- Many neural networks algorithm works better than other algorithm. What is the significance of using vPSOGWO optimization algorithm.
- What about the computational time and memory for using this algorithm in comparison with other conventional methods?
- Note down the advantages, disadvantages and constraints of the algorithm.
- How principle of equivalence problem can be avoided by using this algorithm?
- Which model of the algorithm works well and give more performance – Forward-Inverse modelling?
- Random weights have been fixed for working out the algorithm. Have the authors applied any specific logic in fixing the weights or else any meaning approach implemented? Clarify.
- What are the types of noises involved in training the algorithm? What about SNR?
